# Supplementary material for: Alcamines as corrosion inhibitors for reinforced steel and their effect on cement based materials and mortar performance
Source: Royal Society of Chemistry journal article supplement (doi:10.1039/c5ra00717h), 2015-01-01
Supplement: c5ra00717h1.pdf [file c5ra00717h1.pdf]

|                                  |                                                                                                                                                                                                                                                                                                                                                                                       |
|----------------------------------|---------------------------------------------------------------------------------------------------------------------------------------------------------------------------------------------------------------------------------------------------------------------------------------------------------------------------------------------------------------------------------------|
| <b>Journal:</b>                  | <b>RSC Advances</b>                                                                                                                                                                                                                                                                                                                                                                   |
| <b>Manuscript ID :</b>           | <b>RA-ART-01-2015-000717.R1</b>                                                                                                                                                                                                                                                                                                                                                       |
| <b>Title:</b>                    | <b>“Alcamines as Corrosion Inhibitors for Reinforced Steel and Their Effect on Cement Based Materials and Mortar Performanc ”</b>                                                                                                                                                                                                                                                     |
| <b>Complete List of Authors:</b> | <b>abdelaziz, Hasan; Faculty of Science, El -Mansoura University, Chemistry Department; El Arish Cement Company, Fouda, abd El-aziz; Faculty of Science, El -Mansoura University, Chemistry Department<br/>shalabi, kamal; Faculty of Science, El -Mansoura University, Chemistry Department<br/>Elewady, G.Y.; Faculty of Science, El -Mansoura University, Chemistry Department</b> |

## Supplementary data

Chemical analysis of working electrode observed in the table 1

Tab. 1 Mechanical and chemical analysis of Grade B400B-R Ezz reinforcement steel (12mm diameter).

| Mechanical Properties                 |      | Chemical Analysis |         |
|---------------------------------------|------|-------------------|---------|
| Yield Strength (N/mm <sup>2</sup> )   | 525  | Chemical          | Content |
| Tensile Strength (N/mm <sup>2</sup> ) | 658  | C                 | 0.37    |
| %Elongation                           | 15.5 | P                 | 0.02    |
|                                       |      | S                 | 0.034   |

Chemical analysis of the raw materials that used in preparing cement samples observed the quality of clinker, gypsum and limestone

Tab.2: XRF chemical analysis of cement raw materials

| Cement Raw Materilas | XRF analysis     |                                |                                |       |      |                 |                  |                   |       |          | Bouge calculation |       |      |       |
|----------------------|------------------|--------------------------------|--------------------------------|-------|------|-----------------|------------------|-------------------|-------|----------|-------------------|-------|------|-------|
|                      | SiO <sub>2</sub> | Al <sub>2</sub> O <sub>3</sub> | Fe <sub>2</sub> O <sub>3</sub> | CaO   | MgO  | SO <sub>3</sub> | K <sub>2</sub> O | Na <sub>2</sub> O | Cl    | Free CaO | C3S               | C2S   | C3A  | C4AF  |
| Clinker              | 21.83            | 5.94                           | 4.29                           | 65.66 | 0.76 | 0.65            | 0.43             | 0.33              | 0.021 | 0.49     | 51.43             | 23.81 | 8.49 | 13.04 |
| Gypsum               | 2.18             | 0.29                           | 0.17                           | 33.46 | 1.53 | 42.0            | 0.05             | 0.03              | 0.021 |          | -----             |       |      |       |
| Limestone            | 1.06             | 0.26                           | 0.05                           | 54.73 | 0.36 | 0.01            | 0.06             | 0.05              | 0.02  |          | -----             |       |      |       |

Chemical analysis of cement samples to measure the optimization of cement components

Tab.3: Chemical and mineralogical composition of cement (95%Clinker + 5%Gypsum) and cement (95%Clinker + 5%Gypsum + 4%Limestone)

| Comp.    | Conc., ppm | Chemical composition percentage |                                |                                |       |      |                 |                  |                   |      |      | LOI  | FL   | Blaine cm <sup>2</sup> /g | Cement moduli |      |       | Mineralogical composition |      |       |  |
|----------|------------|---------------------------------|--------------------------------|--------------------------------|-------|------|-----------------|------------------|-------------------|------|------|------|------|---------------------------|---------------|------|-------|---------------------------|------|-------|--|
|          |            | SiO <sub>2</sub>                | Al <sub>2</sub> O <sub>3</sub> | Fe <sub>2</sub> O <sub>3</sub> | CaO   | MgO  | SO <sub>3</sub> | K <sub>2</sub> O | Na <sub>2</sub> O | Cl   | LSF  |      |      |                           | SM            | AM   | C3S   | C2S                       | C3A  | C4AF  |  |
| Blank I  | ---        | 20.43                           | 5.65                           | 4.07                           | 64.15 | 0.73 | 2.85            | 0.32             | 0.28              | 0.05 | 0.83 | 0.68 | 3317 | 93.44                     | 2.1           | 1.39 | 51.14 | 20.01                     | 8.09 | 12.37 |  |
| TIPA85   | 150        | 20.68                           | 5.67                           | 4.11                           | 64.42 | 0.74 | 2.81            | 0.32             | 0.27              | 0.04 | 0.85 | 0.62 | 3366 | 92.84                     | 2.11          | 1.38 | 50.5  | 21.21                     | 8.08 | 12.49 |  |
| CA92     | 150        | 20.5                            | 5.63                           | 4.09                           | 64.73 | 0.72 | 2.88            | 0.33             | 0.27              | 0.05 | 0.85 | 0.55 | 3358 | 94.02                     | 2.11          | 1.38 | 53.52 | 18.42                     | 8.01 | 12.43 |  |
| Blank II | ---        | 19.65                           | 5.47                           | 3.96                           | 64.59 | 0.69 | 2.89            | 0.34             | 0.25              | 0.06 | 2.3  | 0.8  | 3570 | 97.69                     | 2.08          | 1.38 | 59.62 | 11.38                     | 7.8  | 12.04 |  |
| TIPA85   | 150        | 19.68                           | 5.5                            | 3.98                           | 64.6  | 0.69 | 2.9             | 0.32             | 0.27              | 0.05 | 2.35 | 0.67 | 3615 | 97.49                     | 2.08          | 1.38 | 59.7  | 11.41                     | 7.85 | 12.1  |  |
| CA92     | 150        | 19.64                           | 5.6                            | 3.72                           | 64.01 | 0.75 | 3.15            | 0.31             | 0.28              | 0.07 | 2.43 | 0.69 | 3625 | 96.54                     | 2.11          | 1.51 | 56.51 | 13.7                      | 8.55 | 11.31 |  |

Flexural and Compressive strength for 3 mould of cement mortars for 2 days and 28 days

Tab.4: The results of Flexural and Compressive strength of cement mortars for 2 days and 28 days according to EN-197-1

| Cement-based materials |            |                               |                                  |                                  |                               |                                  |                                  |
|------------------------|------------|-------------------------------|----------------------------------|----------------------------------|-------------------------------|----------------------------------|----------------------------------|
| Comp.,                 | Conc., ppm | Cement strength (2 days)      |                                  |                                  | Cement strength ( 28 days)    |                                  |                                  |
|                        |            | Flexural (N/mm <sup>2</sup> ) | Compressive (N/mm <sup>2</sup> ) | Compressive (N/mm <sup>2</sup> ) | Flexural (N/mm <sup>2</sup> ) | Compressive (N/mm <sup>2</sup> ) | Compressive (N/mm <sup>2</sup> ) |
| Blank I                | --         | 5.2                           | 30                               | 28.8                             | 7.7                           | 58.6                             | 56.7                             |
|                        |            | 5.6                           | 30                               | 28.8                             | 8.0                           | 59.3                             | 60.3                             |
|                        |            | 5.3                           | 27.5                             | 28.7                             | 6.8                           | 56.7                             | 55.7                             |
|                        |            | AV <sub>2</sub> ,=5.4         | AV <sub>2</sub> ,=29             |                                  | AV <sub>28</sub> ,=7.5        | AV <sub>28</sub> ,=57.9          |                                  |
| TIPA85                 | 150        | 5.3                           | 27                               | 29.0                             | 7.8                           | 61.0                             | 60.3                             |
|                        |            | 5.1                           | 25.9                             | 27.8                             | 8.2                           | 67.1                             | 66.3                             |
|                        |            | 5.4                           | 26.5                             | 28.2                             | 8.1                           | 65.2                             | 62.8                             |
|                        |            | Av <sub>2</sub> ,=5.3         | Av <sub>2</sub> ,=27.4           |                                  | Av <sub>28</sub> ,=8.1        | Av <sub>28</sub> ,=63.8          |                                  |
| CA92                   | 150        | 5.5                           | 30.3                             | 29.2                             | 7.7                           | 61.2                             | 58.3                             |
|                        |            | 5.5                           | 29.7                             | 30.5                             | 7.7                           | 60.7                             | 58.3                             |
|                        |            | 5.0                           | 29.8                             | 30.9                             | 7.1                           | 57.2                             | 58.1                             |
|                        |            | AV <sub>2</sub> ,=5.4         | AV <sub>2</sub> ,=30.1           |                                  | AV <sub>28</sub> ,=7.5        | AV <sub>28</sub> ,=58.96         |                                  |
| Blank II               | --         | 5.3                           | 25.6                             | 25.4                             | 8.2                           | 54.3                             | 54.8                             |
|                        |            | 5.2                           | 26.3                             | 26.5                             | 8.6                           | 57.0                             | 56.5                             |
|                        |            | 4.7                           | 26.8                             | 26.0                             | 8.5                           | 55.3                             | 56.8                             |
|                        |            | AV <sub>2</sub> ,=5.1         | AV <sub>2</sub> ,=26.1           |                                  | AV <sub>28</sub> ,=8.4        | AV <sub>28</sub> ,=55.8          |                                  |
| TIPA85                 | 150        | 5.5                           | 30.8                             | 32.1                             | 8.7                           | 66.1                             | 64.5                             |
|                        |            | 4.9                           | 28.8                             | 29.5                             | 8.4                           | 60.8                             | 61.3                             |
|                        |            | 5.1                           | 30.8                             | 29.1                             | 8.5                           | 64.7                             | 61.6                             |
|                        |            | AV <sub>2</sub> ,=5.2         | AV <sub>2</sub> ,=30.2           |                                  | AV <sub>28</sub> ,=8.6        | AV <sub>28</sub> ,=63.2          |                                  |
| CA92                   | 150        | 5.7                           | 33.2                             | 33.7                             | 8.6                           | 64.7                             | 66.4                             |
|                        |            | 5.7                           | 33.8                             | 34.2                             | 8.6                           | 62.4                             | 62.9                             |
|                        |            | 6.0                           | 34.5                             | 33.2                             | 9.1                           | 60.3                             | 64.5                             |
|                        |            | AV <sub>2</sub> ,=5.8         | AV <sub>2</sub> ,=33.7           |                                  | AV <sub>28</sub> ,=8.8        | AV <sub>28</sub> ,=63.5          |                                  |
